# Nck adaptors at a glance

Briana C. Bywaters\* and Gonzalo M. Rivera\*

## ABSTRACT

The non-catalytic region of tyrosine kinase (Nck) family of adaptors, consisting of Nck1 and Nck2, contributes to selectivity and specificity in the flow of cellular information by recruiting components of signaling networks. Known to play key roles in cytoskeletal remodeling, Nck adaptors modulate host cell–pathogen interactions, immune cell receptor activation, cell adhesion and motility, and intercellular junctions in kidney podocytes. Genetic inactivation of both members of the Nck family results in embryonic lethality; however, viability of mice lacking either one of these adaptors suggests partial functional redundancy. In this Cell Science at a Glance and the accompanying poster, we highlight the molecular organization and functions of the Nck family, focusing on key interactions and pathways, regulation of cellular

processes, development, homeostasis and pathogenesis, as well as emerging and non-redundant functions of Nck1 compared to those of Nck2. This article thus aims to provide a timely perspective on the biology of Nck adaptors and their potential as therapeutic targets.

**KEY WORDS:** Actin dynamics, Nck, Signaling, Tyrosine phosphorylation, SH2 domain, SH3 domain

## Introduction

Non-catalytic region of tyrosine kinase (Nck) adaptors are ubiquitously expressed proteins that relay signals from phosphotyrosine to proline-rich effectors, thereby organizing molecular ensembles that regulate cellular functions. Nck adaptors were first isolated from a cDNA library of human melanoma cells (Lehmann et al., 1990), and the *Drosophila melanogaster* Nck homolog is required for photoreceptor axon guidance and targeting (Garry et al., 1996), hinting at a role in development. In *Xenopus laevis*, expression of Nck mutants alters dorsoventral patterning, providing the first evidence of Nck involvement in vertebrate embryogenesis (Tanaka et al., 1997). The mammalian Nck family

Department of Veterinary Pathobiology, Texas A&M University, College Station, TX 7783, USA.

\*Authors for correspondence (bbywaters@cvm.tamu.edu; grivera@cvm.tamu.edu)

DOI: 10.1242/jcs.258965

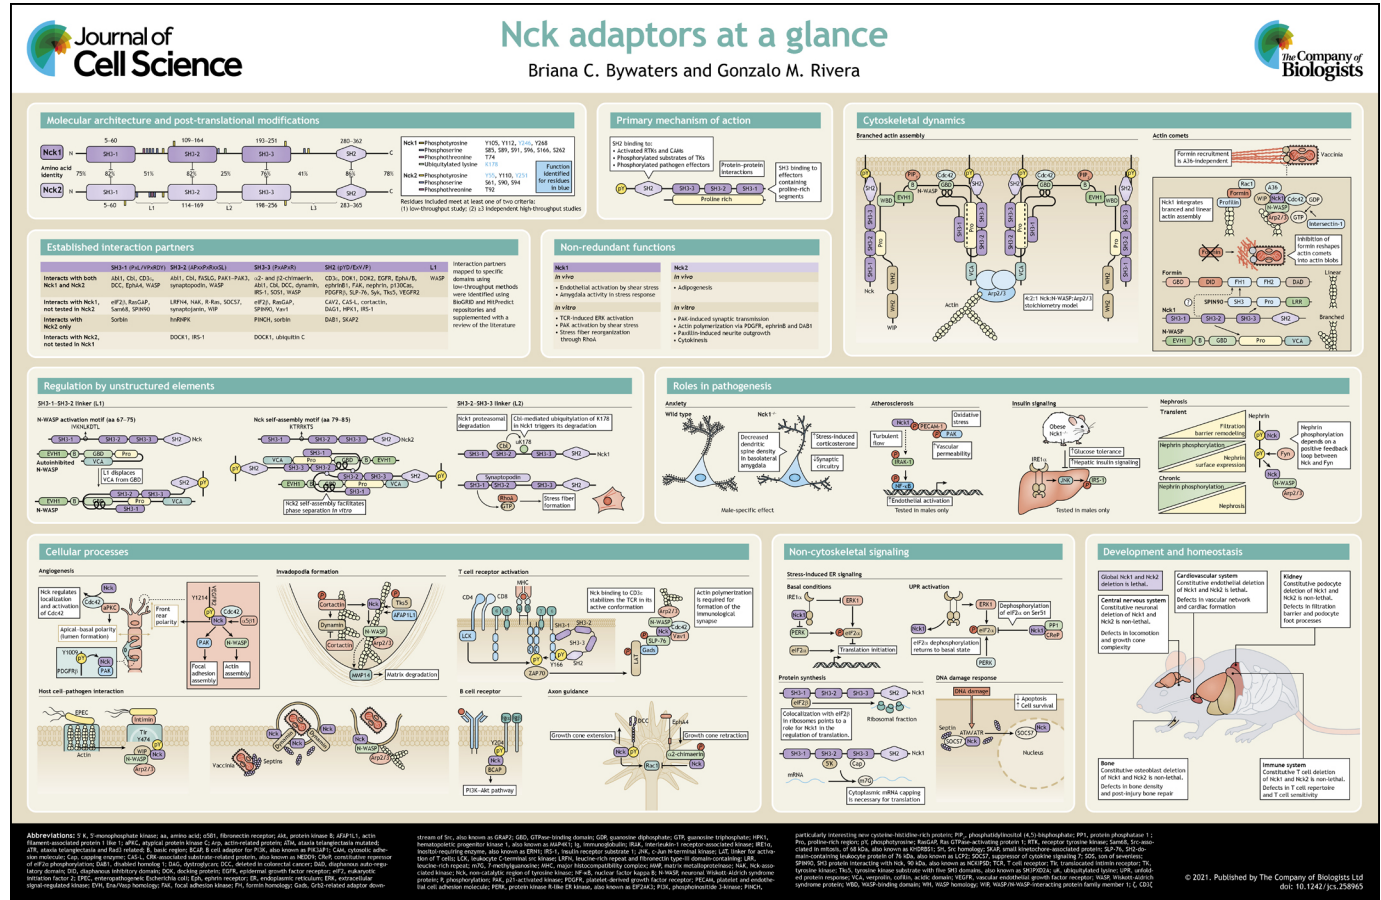

consists of two genes, Nck1 (also known as Nck $\alpha$ ) and Nck2 (also known as Nck $\beta$  or Grb4), which we herein refer to collectively as Nck. These genes display broad and partially overlapping tissue expression pattern (Bladt et al., 2003); however, Nck2 expression appears somewhat restricted (Chen et al., 1998). Human and mouse Nck orthologs share 96% amino acid identity, whereas Nck paralogs share 68% amino acid identity (Chen et al., 1998).

Nck remodels the actin cytoskeleton (Li et al., 2001; Buday et al., 2002) and also regulates host cell–pathogen interactions (Frischknecht et al., 1999; Moreau et al., 2000), lymphocyte antigen receptors (Gil et al., 2002; Barda-Saad et al., 2010; Castello et al., 2013), intercellular junctions (Jones et al., 2006; Verma et al., 2006), cell–matrix adhesions (Chaki et al., 2013) and cell migration (Ruusala et al., 2008; Chaki et al., 2013). Recent studies suggest that Nck modulates the specific activity of biomolecular condensates that are generated by phase separation (Banani et al., 2017; Case et al., 2019a) and plays tissue-specific roles. Blending well-established and new themes in the biology of Nck, this Cell Science at a Glance article and accompanying poster outline how these adaptors contribute to signal propagation and highlight their emerging functions in development, homeostasis and disease.

### Molecular architecture

Nck adaptors mediate protein–protein interactions, thereby relocating signaling components and increasing their local concentrations. Their architecture consists of three N-terminal Src homology (SH) 3 domains and a C-terminal SH2 domain tethered by unstructured linkers (Chen et al., 1998) (see poster). Nck adaptors assemble multimolecular signaling complexes initiated by activated receptor tyrosine kinases (RTKs) and phosphorylated substrates of non-receptor tyrosine kinases (TKs) that act as docking sites for the SH2 domain (Wagner et al., 2013). Nck SH3 domains bind to proline-rich motifs constitutively to recruit additional signaling components (Mayer, 2001). Modulation of signaling by interdomain linker sequences is also increasingly appreciated (Takeuchi et al., 2010; Banjade et al., 2015; Okrut et al., 2015). Nck adaptors undergo post-translational modifications, including ubiquitylation and phosphorylation; however, their significance is only beginning to be recognized (Anselmi et al., 2012; Buvall et al., 2013; Dionne et al., 2018).

### SH2 domain

Signaling by tyrosine phosphorylation, which is critical in development and disease (Hunter, 2009), is propagated by proteins containing phosphotyrosine-binding domains (Schlessinger and Lemmon, 2003; Wagner et al., 2013). The SH2 domain (Songyang et al., 1993; Liu et al., 2006a), which consists of ~100 residues, binds to phosphotyrosine with a selectivity that is partially dependent on the identity of the surrounding amino acid sequence (Machida and Mayer, 2005; Tinti et al., 2013; Marasco and Carlomagno, 2020). Nck1 and Nck2 SH2 domains, which share ~82% amino acid sequence identity, appear to bind *in vitro* to similar phosphopeptides with sequence pY[D/E]x[V/P] (where x indicates any residue) (Frese et al., 2006); however, comparative analysis of binding specificities *in vivo* has not been performed. Nck SH2 is recruited to activated RTKs [e.g. platelet-derived growth factor receptor  $\beta$  (PDGFR $\beta$ ), vascular endothelial growth factor receptor 2 (VEGFR2) and EphA4] (Nishimura et al., 1993; Chen et al., 2000; Lamalice et al., 2006; Bisson et al., 2007; Fawcett et al., 2007), as well as phosphorylated substrates of TKs [e.g. p62Dok (also known as DOK1), p130Cas (also known as BCAR1), Tks5 (also known as SH3PXD2A) and cortactin (CTTN)] (Woodring

et al., 2004; Rivera et al., 2006; Stylli et al., 2009; Oser et al., 2010), cell adhesion proteins (e.g. nephrin and PECAM-1) (Jones et al., 2006; Chen et al., 2015) and pathogen effectors (e.g. A36R and Tir) (Frischknecht et al., 1999; Gruenheid et al., 2001; Campellone et al., 2002) (see poster). Preferential interactions of Nck2 versus Nck1 with activated epidermal growth factor receptor (EGFR) (Chen et al., 1998), PDGFR $\beta$  (Chen et al., 1998; Chen et al., 2000) and ephrinB1 (Cowan and Henkemeyer, 2001) have been identified.

### SH3 domains

The SH3 domain, which is ~60 residues long, recognizes proline-rich sequences in peptides and regulates intramolecular interactions, the local concentration and distribution of binding partners, and the assembly of multiprotein complexes (Mayer, 2001; Dionne et al., 2021). Canonical SH3 domain–peptide interactions involve a flat, hydrophobic patch and adjacent negatively charged binding site that interact, respectively, with a PxxP sequence and a positively charged residue (+) in ligands (+xxPxxP in class I ligands, xPxxPx+ in class II ligands) (Feng et al., 1994; Lim et al., 1994). Alternative recognition mechanisms have long been appreciated (Saksela and Permi, 2012); about half of the ~300 SH3 domains in the human proteome exhibit non-canonical binding specificities (Teyra et al., 2017).

Nck adaptors engage various binding partners through SH3-mediated interactions (see poster). Partner selection is partially explained by the intrinsic binding specificities of individual Nck SH3 domains (Liu et al., 2006b; Carducci et al., 2012; Teyra et al., 2017). Steric and electrostatic differences contribute to selectivity; the Nck1 SH3-2 domain possesses a more negatively charged surface region than that of the SH3-1 domain (Liu et al., 2006b; Hake et al., 2008). Another specificity determinant is an intramolecular interaction between the SH3-1–SH3-2 linker (L1) and the SH3-2 domain of Nck2 that masks the proline-rich binding site (Takeuchi et al., 2010). Nck SH3-mediated interactions are modulated by phosphorylation in ligands as well as the SH3 domains; binding of the Nck SH3-2 domain to the PxxPxxRxxS peptide from the serine/threonine kinase p21-activated kinase 1 (PAK1) is inhibited by serine phosphorylation (Ser21) (Zhao et al., 2000; Zhou et al., 2003). Similarly, the interaction between the Nck SH3-1 domain and the PxxPxRDY peptide from CD3 $\epsilon$  in the T cell receptor (TCR) complex is disrupted by tyrosine phosphorylation (Tyr166) (Kesti et al., 2007; Takeuchi et al., 2008). Phosphorylation of a conserved tyrosine residue in the C terminus of Nck SH3 domains (Tyr246 in Nck1, Tyr55 and Tyr251 in Nck2) disrupts interactions with effector molecules and abrogates downstream signaling (Dionne et al., 2018). Cooperative binding of Nck SH3 domains also regulates binding specificity (Wunderlich et al., 1999). Finally, binding partner identity and the position of the Nck SH3 domains largely determines the specificity of interactions *in vivo* (Dionne et al., 2021). Shuffling of SH3 domains in Nck2 disrupts protein–protein interactions and the ability to undergo phase separation (Dionne et al., 2021), the segregation of solution components into dense and dilute phases (Box 1).

### Unstructured elements

The notion that Nck adaptors adopt a ‘beads on a string’ architecture due to their modular organization has been challenged by the demonstration of an intramolecular interaction involving a conserved basic motif in L1 (residues ~62–109) and the second SH3 domain (Takeuchi et al., 2010). L1 also contains an activation motif that drives actin assembly stimulated by Wiscott–Aldrich

**Box 1. Emerging functions of Nck adaptors**

Biomolecular condensates are discrete, non-membrane-bound compartments in cells that contain densely packed macromolecules; their formation and dynamics are governed by liquid–liquid phase separation (LLPS) (Hyman et al., 2014). Importantly, biomolecular condensates regulate biological processes by diverse mechanisms, such as increased reaction specificity and kinetics, modulation of activity by sequestration or exclusion, and buffering of biomolecule concentration (Lyon et al., 2020). In imbalanced states, biomolecular condensates can contribute to pathogenesis (Wegmann et al., 2018).

Initial studies linking Nck to the assembly of biomolecular condensates in membranes have shown that multivalent interactions between tyrosine-phosphorylated nephrin, Nck and N-WASP promote phase transitions that correlate with increased actin polymerization by the Arp2/3 complex (Li et al., 2012). Increased specific activity of the complex (i.e. rates of actin polymerization) is a direct function of increased dwell time of N-WASP and the Arp2/3 complex, a property shown to be independent of the density of N-WASP but dependent on the stoichiometry of molecular components in phase-separated condensates (Case et al., 2019b). Interestingly, the conserved L1 linker interacts weakly with the SH3-2 domain of Nck, thereby promoting Nck self-association and potentiating phase separation of the nephrin–Nck–N-WASP complex (Banjade et al., 2015). Intriguingly, the position of SH3 domains in Nck2 has been shown to impact the ability of the protein to phase separate; strikingly, shuffling SH3-2 to the third position increases the stability of Nck2 condensates, a finding that highlights the importance of the protein context in determining the signaling properties of modular domains (Dionne et al., 2021). Biomolecular condensates also form at the immunological synapse, the site of interaction between an antigen-presenting cell and a T cell. A peripheral branched actin network and inner concentric actin arcs of linear actin polymers can be distinguished in the synapse; centripetal movement across the synapse is powered by retrograde flow of the branched network and myosin-dependent inward contraction of the linear filaments (Hammer et al., 2019). Transport of TCR microclusters is important for signaling and maturation of the immunological synapse and effector functions of T cells (Hashimoto-Tane and Saito, 2016). Nck has been shown to contribute to multivalency-driven phase separation of LAT, a critical component of the TCR signaling complex (Su et al., 2016). In addition, LAT condensates bind to actin filaments through basic residues present in the L1 region of Nck and the polybasic motif of N-WASP, and importantly, the presence of Nck and N-WASP determines how LAT condensates are propelled through the actin networks in the synapse (Ditlev et al., 2019). It should be noted that research uncovering a role for Nck in biomolecular condensate formation and signaling has been largely based on *in vitro* reconstitution systems; therefore, the pathophysiological significance of such findings remains undetermined.

syndrome protein (WASP) and the related neuronal WASP (N-WASP, also known as WASL) (Okrut et al., 2015), actin nucleation-promoting factors that bind to G-actin and the Arp2/3 complex (Padrick et al., 2008). Activity of WASP and N-WASP is controlled by autoinhibition mediated by an intramolecular interaction between the GTPase-binding domain (GBD) and the verprolin, cofilin, acidic (VCA) domain (Rohatgi et al., 2000). The activation motif of L1 interacts directly with the GBD, thereby displacing VCA to release WASP and N-WASP autoinhibition (Okrut et al., 2015); however, full activation of N-WASP requires cooperative binding of the L1 and all three SH3 domains. L1 also promotes phase separation and Nck self-assembly through weak interactions with SH3-2 (Banjade et al., 2015). Although the functional significance of other unstructured regions remains undetermined, it is noteworthy that ubiquitylation of Lys178 in the linker between SH3-2 and SH3-3 (L2) triggers proteasomal degradation of Nck1 and concomitant modulation of RhoA activation (Buvall et al., 2013).

**Major signaling pathways and key molecular interactions****Cytoskeletal dynamics**

Nck links activated RTKs and cytosolic substrates of TKs with effectors that modulate actin polymerization (see poster). Nck1-stimulated actin nucleation by the N-WASP–Arp2/3 complex requires all three SH3 domains and is further stimulated by phosphatidylinositol (4,5)-bisphosphate (PIP<sub>2</sub>) (Rohatgi et al., 2001; Rivera et al., 2009). Clustering of Nck1 SH3 domains leads to the formation of actin comets (Rivera et al., 2004), which are actin structures used for movement of endocytic vesicles and organelles (Khaitlina, 2014) as well as by intracellular pathogens for intercellular spreading (Welch and Way, 2013). This pathway also involves WASP/N-WASP-interacting protein family member 1 (WIPF1 or WIP) (Benesch et al., 2002; Donnelly et al., 2013). WIP interacts directly with Nck and N-WASP (Anton et al., 1998) and promotes the formation of actin comets (Moreau et al., 2000) and filopodia (Martinez-Quiles et al., 2001), which are thin actin-based membrane protrusions used by cells to explore their microenvironment (Mattila and Lappalainen, 2008). The exchange rate of N-WASP in the Nck–WIP-containing complex controls the rate of actin polymerization (Weisswange et al., 2009). Dimerization and/or oligomerization of Nck SH3 domains increases actin polymerization by the N-WASP–Arp2/3 complex (Padrick et al., 2008). A model including WIP and the Nck–N-WASP–Arp2/3 complex with a stoichiometry of 4:2:1 (Ditlev et al., 2012) highlights the importance of cooperative assembly for full activation of actin polymerization and suggests a mechanism that prevents activation by low-intensity signals. Initial studies implicated Nck in actin polymerization stimulated by the Scar/WAVE complex (Eden et al., 2002). Although activation of Scar/WAVE has subsequently been shown to require coincident signals of activated Rac1, acidic phospholipids and phosphorylation events (Lebensohn and Kirschner, 2009), Nck localizes Scar/WAVE during phagocytosis mediated by the granulocyte receptor carcinoembryonic antigen-related cell adhesion molecule 3 (CEACAM3; Pils et al., 2012).

Nck also cooperates with Rho GTPases (see poster). Nck1 and Cdc42, with participation of intersectin-1, stimulate actin polymerization in Fcγ receptor-mediated phagocytosis and vaccinia-induced actin comets (Dart et al., 2012; Humphries et al., 2014). A similar mechanism is coordinated by Nck during TCR ligation, wherein Vav1 is required for Cdc42 activation and stabilization of active N-WASP (Zeng et al., 2003).

Stress fibers – bundles of unbranched actin filaments polymerized by formins (Hotulainen and Lappalainen, 2006) – are involved in adhesion and contractility of migrating cells (Livne and Geiger, 2016). Nck1 cooperates with RhoA in stress fiber formation through a mechanism dependent on inhibition of Nck1 ubiquitylation by Cbl (also known as c-Cbl) and subsequent proteasomal degradation (Buvall et al., 2013). Of note, Nck1 integrates dendritic and unbranched actin polymerization (Borinskaya et al., 2016; Pfanzelter et al., 2018). The balance between these two modes of actin assembly determines the morphology and dynamics of actin structures; inhibition of unbranched actin polymerization reshapes long, fast-moving actin comets into circular structures with low mobility (Borinskaya et al., 2016). Nck1 may interact with formins directly or through the adaptor SH3 protein interacting with Nck, 90 kDa (SPIN90, also known as WISH or NCKIPSD) (Borinskaya et al., 2016). Although most studies on actin dynamics focus on Nck1, a specific role for Nck2 in cytokinesis has been identified (Jacquet et al., 2018).

### Stress-induced endoplasmic reticulum signaling

Endoplasmic reticulum (ER) stress activates the unfolded protein response (UPR) (Ron and Walter, 2007), causing cells to downregulate protein synthesis and upregulate expression of genes involved in protein folding, antioxidative response, autophagy and apoptosis (Hetz et al., 2020). To prevent general translation initiation, ER stress induces phosphorylation of eukaryotic initiation factor 2 $\alpha$  (eIF2 $\alpha$ , also known as EIF2S1). Moderate overexpression of Nck1 facilitates translation by preventing eIF2 $\alpha$  phosphorylation (Kebache et al., 2004; Cardin et al., 2007); in contrast, Nck deficiency decreases protein synthesis during ER stress (Kebache et al., 2004). Nck1 inhibits PKR-like endoplasmic reticulum kinase (PERK, also known as EIF2AK3), a major ER stress transducer, and so contributes to maintaining eIF2 $\alpha$  hypophosphorylation (Yamani et al., 2014). Under ER stress, Nck1 promotes hypophosphorylation of eIF2 $\alpha$  by forming a complex with protein phosphatase 1 (PP1) and its regulatory subunit CREP (also known as PPP1R15B; Latreille and Larose, 2006) (see poster). Under basal conditions, Nck associates with the ER membrane and forms a complex with serine/threonine-protein kinase/endoribonuclease 1 (IRE1 $\alpha$ , also known as ERN1), a UPR inducer, thereby preventing downstream activation of extracellular signal-related kinase 1 (ERK1, also known as MAPK3), a critical modulator of cell survival (Nguyen et al., 2004). Of note, Nck1 is predominantly expressed in the liver and adipose tissue (Latreille et al., 2011).

### Protein synthesis

Nck1 facilitates mRNA translation by interacting directly with the  $\beta$  subunit of eukaryotic initiation factor 2 (eIF2 $\beta$ , also known as EIF2S2), a component of the protein translation machinery, and localizing to ribosomal fractions of insulin-stimulated cells (Kebache et al., 2002). Nck1 also regulates assembly of the cytoplasmic mRNA capping complex by recruiting 5'-monophosphate kinase and capping enzyme (Mukherjee et al., 2014). Capping of 5' ends of all eukaryotic mRNAs is important for regulation of cap-dependent initiation of translation and mRNA decay (Schoenberg and Maquat, 2009). The possibility that Nck links cytoskeletal organization and translation regulation remains unexplored.

### Genotoxic stress and the DNA damage response

Septins are GTPases involved in spatial organization of signaling components and membrane asymmetry (Spiliotis and McMurray, 2020). Septin depletion leads to nuclear translocation of Nck in association with suppressor of cytokine signaling 7 (SOCS7) (Kremer et al., 2007; Errington and Macara, 2013). Genotoxic stresses, such as UV irradiation and activation of the DNA damage response (DDR), disrupt the septin and actin cytoskeleton, thus leading to nuclear accumulation of Nck (Kremer et al., 2007). Silencing of Nck or prevention of its nuclear translocation increases phosphorylation of p53 (also known as TP53) and apoptosis in response to UV irradiation (Errington and Macara, 2013). Further studies are needed to fully elucidate the links between the distribution of Nck (cytosolic versus nuclear), cytoskeletal remodeling, cell cycle regulation and apoptosis.

### Nck in cellular processes

#### Cell polarity, adhesion and migration

Nck regulates cell migration induced by activated RTKs, such as PDGFR $\beta$  (Rivera et al., 2006; Ruusala et al., 2008; Guan et al., 2009) and VEGFR2 (Stoletov et al., 2001; Lamalice et al., 2006) (see poster). Directional cell migration requires front-rear polarity, which is established by differential distribution and activation of

Rho GTPases, phosphoinositides and polarity complexes (Nelson, 2009). Sprouting angiogenesis (Adams and Alitalo, 2007), modulated by Nck (Clouthier et al., 2015), involves recruitment of Nck to activated VEGFR2 to promote focal adhesion assembly by activated PAK (Stoletov et al., 2001). Nck-dependent directional migration of endothelial cells involves coordination of membrane protrusion and focal adhesion dynamics through active Cdc42 (Chaki et al., 2013). Nck also contributes to endothelial morphogenesis by regulating apical-basal polarization and lumenization through the Cdc42-atypical protein kinase C (aPKC) polarity complex (Chaki et al., 2015). Genetic inactivation of Nck compromises retinal angiogenesis in mice by preventing Cdc42 and PAK2 activation downstream of activated VEGFR2 and roundabout guidance receptor 1 (ROBO1) (Dubrac et al., 2016). Genetic inactivation of Nck also inhibits pericyte migration in mice by preventing ligand-induced phosphorylation of PDGFR $\beta$  at Tyr1009 and downstream PAK activation (Dubrac et al., 2018).

#### Formation of invadopodia and metastatic invasion

Invadopodia are actin-based protruding structures that facilitate tissue invasion and metastasis by cancer cells (Eddy et al., 2017). Cortactin is a protein required for formation of invadopodia (Artym et al., 2006). Whereas unphosphorylated cortactin binds and inhibits the actin filament-severing protein cofilin, phosphorylated cortactin unleashes cofilin activity to generate free barbed ends of actin filaments (Oser et al., 2009). Nck1 is involved in formation of invadopodia (Yamaguchi et al., 2005) and is recruited to phosphorylated cortactin through its SH2 domain (Oser et al., 2010) (see poster). Nck forms a complex with the adaptor Tks5 to facilitate invadopodia formation and matrix degradation (Stylli et al., 2009). In sarcoma cells, Nck2 binds to phosphorylated AFAP1L1 to enhance formation of invadopodia (Tie et al., 2016). Nck promotes invasion of breast carcinoma cells and metastasis by regulating invadopodia actin dynamics and enhancing matrix metalloproteinase 14 (MMP14) cell-surface accumulation and extracellular matrix proteolysis (Morris et al., 2017). Nck likely regulates surface levels of MMP14 through N-WASP localization and actin polymerization; N-WASP regulates trafficking of MMP14 from late endosomes to invadopodia, where it is stabilized by F-actin (Yu et al., 2012).

#### B cell receptor activation

Antigen binding to immunoglobulins at the surface of B cells activates the B cell receptor (BCR) through phosphorylation of immunoreceptor tyrosine-based activation motifs (ITAMs) on the cytoplasmic tails of the immunoglobulin- $\alpha$  (CD79A) and immunoglobulin- $\beta$  (CD79B) subunits (Tanaka and Baba, 2020) (poster). Through its SH2 domain, Nck binds directly to phosphorylated Tyr204 (a non-ITAM residue) in the tail of immunoglobulin- $\alpha$ . Through its SH3 domains, Nck subsequently recruits the adaptor BCAP (also known as PIK3AP1) to sites of BCR signaling, thereby modulating the phosphoinositide 3-kinase (PI3K)-Akt pathway (Castello et al., 2013) required for B cell survival and maturation (Calamito et al., 2010) (see poster). Genetic inactivation of Nck reduces survival, proliferation and antibody responses of B cells due to decreased BCAP recruitment and defective PI3K-Akt signaling (Castello et al., 2013).

#### TCR activation

Nck adaptors shape the T cell repertoire to optimize antigenic coverage and T cell responses (Lettau et al., 2009). TCR consists of

clonotypic receptor chains ( $\alpha$  and  $\beta$ , encoded by *TRA* and *TRB*, respectively) and CD3 subunits ( $\gamma$ ,  $\delta$ ,  $\epsilon$  and  $\zeta$ , which is also known as CD247) that are activated by binding to peptide-major histocompatibility complexes expressed on antigen-presenting cells (see poster). Recruitment of the tyrosine kinase LCK by co-receptors CD4 or CD8 leads to phosphorylation of ITAMs in CD3 subunits that serve as docking sites for signaling molecules, including the tyrosine kinase ZAP70 (Love and Hayes, 2010). Once recruited, ZAP70 phosphorylates the transmembrane adaptor protein linker for activation of T cells (LAT), leading to formation of the LAT signalosome, which includes the scaffold SLP-76 (also known as LCP2) (Gaud et al., 2018). Upon SLP-76 phosphorylation, a complex of Nck, Vav1 and Cdc42 activates N-WASP-dependent actin polymerization (Zeng et al., 2003), thereby facilitating the formation of the immunological synapse between an antigen-presenting cell and the T cell (Kumari et al., 2014). Upon TCR activation, the CD3 $\epsilon$  subunit exposes a proline-rich segment that recruits Nck via its SH3-1 domain (Gil et al., 2002). Sequential binding of both the SH3-1 and SH2 domains of Nck1 to CD3 $\epsilon$  (Paensuwan et al., 2016) promotes phosphorylation of CD3 $\zeta$  and recruitment of ZAP70, which are required for development and activation of mature T cells (Borroto et al., 2014). A receptor kinase motif in the cytoplasmic tail of CD3 $\epsilon$  that is exposed upon TCR activation recruits LCK through its SH3 domain (Hartl et al., 2020). The cooperative binding of Nck SH3-1 domain and the LCK SH3 domain to separate motifs on CD3 $\epsilon$  contributes to optimal TCR signaling (Hartl et al., 2021). Genetic deletion of Nck results in T cell lymphopenia and diminished TCR response (Roy et al., 2010).

#### Modulation of host cell–pathogen interactions

Nck is necessary for enteropathogenic *Escherichia coli* (EPEC) colonization and the formation of attaching and effacing lesions in intestinal cells (Vallance and Finlay, 2000). EPEC inserts translocated intimin receptor (Tir) into the plasma membrane of host cells (see poster), which is subsequently phosphorylated in the C terminal region (Tyr474), thus providing a binding site for Nck SH2 (Gruenheid et al., 2001; Campellone et al., 2004). Inhibition of actin polymerization by Crk adaptors, which competitively bind phosphorylated Tir, reduces actin pedestal formation (Nieto-Pelegrin et al., 2014). Furthermore, a peptide that binds to Cys48 in Nck SH3-2, which is involved in WIP–N-WASP recruitment and actin pedestal formation, prevents EPEC infection and protects mice against diarrhea (Qiu et al., 2020).

Poxviruses spread between host cells by stimulating actin polymerization following phosphorylation of viral proteins by host kinases and the recruitment of the Nck–N-WASP–Arp2/3 complex (Dodding and Way, 2009). Vaccinia virus release from infected cells is dependent on Nck-mediated actin polymerization, dynamin recruitment and displacement of a septin cage surrounding the virus (Pfanzer et al., 2018) (see poster). In concert with tyrosine kinase non-receptor 2 (TNK2) and N-WASP, Nck also mediates the endocytic trafficking of picornaviruses (Jiang et al., 2019).

#### Nck in development, homeostasis and pathogenesis

Although genetic inactivation of Nck in mice is embryonically lethal, development proceeds without overt abnormalities in animals lacking only a single paralog (Bladt et al., 2003). This finding suggests that Nck1 and Nck2 have partly overlapping and/or compensatory functions (see poster). In the sections below, we examine the role of Nck in organ systems, highlighting instances of known paralog-specific functions.

#### Cardiovascular system

Endothelial-specific inactivation of Nck results in embryonic lethality due abnormal vascular and heart development (Clouthier et al., 2015). Nck facilitates endocardial cushion formation by enabling endothelial–mesenchymal transition, a processes whereby endothelial cells acquire a migratory, mesenchymal phenotype. In neonatal mice, endothelial-specific inactivation of Nck decreases angiogenic sprouting, impairs retinal vascularization and prevents pathological neovascularization (Dubrac et al., 2016).

Recent studies link Nck to proinflammatory signaling in the vasculature. Nck-mediated NF- $\kappa$ B activation by oxidative stress and expression of proinflammatory molecules in cultured endothelial cells, as well as treatment with a Nck-inhibitory peptide in a model of ischemia–reperfusion injury, block leukocyte infiltration and vascular leakage (Chen et al., 2015). Enhanced vascular permeability in response to atheroprone hemodynamics is prevented by endothelial-specific inactivation of Nck1 (Alfaidi et al., 2020b). Moreover, endothelial Nck1, but not Nck2, has been shown to mediate expression of proinflammatory molecules and atherosclerosis development through activation of NF- $\kappa$ B and the serine/threonine kinase interleukin-1 receptor-associated kinase 1 (IRAK-1) (Alfaidi et al., 2020b). Of note, previous studies linking Nck1 to vascular pathology (Chen et al., 2015; Alfaidi et al., 2020a; Alfaidi et al., 2020b) have been performed in male mice exclusively.

#### Central nervous system

Initial studies *in vitro* have identified specific roles for Nck2 in neurogenesis (Pramatarova et al., 2003; Guan et al., 2007; Thevenot et al., 2011). Consistent with phenotypes in mice deficient for the guidance receptor EphA4 (Dottori et al., 1998) and the downstream effector  $\alpha$ 2-chimaerin (encoded by *CHN1*) (Wegmeyer et al., 2007), genetic neuronal inactivation of Nck in mice causes a hopping gait, resulting from defective corticospinal tract development (Fawcett et al., 2007). Nck also relays signals from deleted in colorectal cancer (DCC), the guidance receptor for netrin-1 that promotes neurite outgrowth in commissural neurons (Li et al., 2002). Genetic deletion of Nck in the nervous system downregulates mRNA levels of DCC and reduces commissural tract thickness and growth cone complexity (Lane et al., 2015). Collectively, these findings suggest that Nck links guidance receptors and effectors controlling neuronal circuit development.

A recent study has shown that Nck1-deficient male mice, but not females, display increased anxiety-like behaviors and elevated stress-induced circulating corticosterone compared to control mice (Diab et al., 2020). This sex-specific effect has been linked to decreased GABAergic neuronal activation in the prefrontal cortex, decreased activation of inhibitory interneurons and loss of spine density (Diab et al., 2020).

#### Kidney

Podocytes are glomerular kidney epithelial cells that form actin-based interdigitating foot processes crucial for glomerular filtration. Genetic inactivation of Nck in podocytes leads to defective foot processes and dysfunctional glomerular filtration (Jones et al., 2006). Actin organization in foot processes requires Nck recruitment to tyrosine-phosphorylated nephrin, a glomerular cell adhesion receptor (Jones et al., 2006; Verma et al., 2006). Nephrin phosphorylation, which is inversely correlated with nephrosis (Uchida et al., 2008), depends on a positive-feedback loop between Nck and the tyrosine kinase Fyn (New et al., 2013). The extent of nephrin phosphorylation and Nck complex formation regulate glomerular filtration by modulating nephrin internalization (Martin et al., 2020).

### Box 2. Nck adaptors as potential therapeutic targets

Several approaches have been developed in attempts to block the function of Nck adaptors *in vivo* in order to test their therapeutic potential. For example, a Nck SH3-2 domain-interacting peptide derived from the N terminus of PAK1, initially shown to block angiogenesis *in vitro* and *in vivo* (Kiosses et al., 2002), has subsequently been shown to ameliorate vascular hyperpermeability in mice (Orr et al., 2007; Chen et al., 2015). Another peptide (Borroto et al., 2014) and a small molecule compound (AX-024) (Borroto et al., 2016) that blocks the interaction between the SH3-1 domain of Nck and a proline-rich sequence in the CD3 $\epsilon$  subunit of TCR have been shown to inhibit T cell activation. Significantly, the Nck-CD3 $\epsilon$ -interaction inhibitor prevents psoriasis and asthma, and has a lasting therapeutic effect in a mouse model of autoimmune encephalomyelitis (Borroto et al., 2016). However, the notion that AX-024 inhibits the interaction between Nck SH3-1 and CD3 $\epsilon$  has recently been challenged; although the drug inhibits T cell proliferation, such effects appear to result from the polypharmacological properties of the drug rather than inhibition of the interaction between Nck SH3-1 and CD3 $\epsilon$  (Richter et al., 2020). Of interest, crystallographic studies have shown that the Nck1 SH3 domain can swap half of its residues to form a dimer that does not bind to CD3 $\epsilon$  (Richter et al., 2020). More recently, a synthetic peptide that interacts with a unique cysteine residue in the SH3-2 domain of Nck has been shown to prevent infection by EPEC and diarrhea in human cells in culture and in mice (Qiu et al., 2020). Finally, a peptide targeting the Nck SH2 domain has been shown to protect pancreatic  $\beta$  cells against diabetogenic stress (Kefalas et al., 2018). Thus, a more refined knowledge of paralog-specific, as well as domain- and unstructured element-specific interactions, is necessary for the design of selective therapeutics targeting Nck.

### Skeletal system

Nck1 deficiency accelerates bone loss in response to mechanical unloading (Aryal et al., 2013). In addition, mice with osteoblast-specific deletion of Nck display osteopenia and reduced bone repair (Aryal et al., 2015).

### Metabolic regulation

Genetic inactivation of Nck1 in mice decreases ER stress in the liver and improves glucose tolerance and insulin signaling (Latreille et al., 2011). In addition, Nck1 deletion upregulates insulin synthesis and increases pancreatic  $\beta$  cell survival in response to diabetogenic stress (Yamani et al., 2014; Yamani et al., 2015). Genetic deletion of Nck2 has been linked to adipogenesis, dyslipidemia and loss of glucose homeostasis (Dusseault et al., 2016). Of note, the roles of Nck1 in glucose homeostasis (Latreille et al., 2011) and of Nck2 in adiposity (Dusseault et al., 2016) have only been studied in male mice.

### Conclusions and perspectives

Since the initial discoveries linking Nck adaptors to signaling via tyrosine phosphorylation and cytoskeletal remodeling, the role of these adaptors in the integration and modulation of cellular processes, tissue homeostasis and dysfunction has been increasingly appreciated. However, several important questions remain and need to be addressed, such as what are the nonredundant functions of Nck1 and Nck2 in physiopathology? What are the precise roles of the modular domains, unstructured elements and post-translational modifications in signaling specificity? In addition, the molecular basis for sex-specific differences in Nck signaling remain unclear, as does the significance of Nck-dependent modulation of molecular condensates in physiology and disease. Further insights into these themes will define their potential as therapeutic targets in specific contexts (Box 2).

### Acknowledgements

We have strived to present a balanced view on the biology of the Nck family of adaptors that reflects the significance of scientific contributions made over the last few years by multiple research groups. Regrettably, space limitations precluded a comprehensive analysis of related published work.

### Competing interests

The authors declare no competing or financial interests.

### Funding

Our work in this area is partly supported by funding from the American Heart Association (829815 to B.C.B. and 17GRNT33680076 to G.M.R.).

### Cell science at a glance

Individual poster panels are available for downloading at <https://journals.biologists.com/jcs/article-lookup/doi/10.1242/jcs.258965#supplementary-data>

### References

- Adams, R. H. and Alitalo, K. (2007). Molecular regulation of angiogenesis and lymphangiogenesis. *Nat. Rev. Mol. Cell Biol.* **8**, 464-478. doi:10.1038/nrm2183
- Alfaidi, M., Acosta, C. H., Wang, D., Traylor, J. G. and Orr, A. W. (2020a). Selective role of Nck1 in atherogenic inflammation and plaque formation. *J. Clin. Invest.* **130**, 4331-4347.
- Alfaidi, M., Bhattarai, U. and Orr, A. W. (2020b). Nck1, but Not Nck2, mediates disturbed flow-induced p21-activated kinase activation and endothelial permeability. *J. Am. Heart Assoc.* **9**, e016099. doi:10.1161/JAHA.120.016099
- Anselmi, F., Orlandini, M., Rocchigiani, M., De Clemente, C., Salameh, A., Lentucci, C., Oliviero, S. and Galvagni, F. (2012). c-ABL modulates MAP kinases activation downstream of VEGFR-2 signaling by direct phosphorylation of the adaptor proteins GRB2 and NCK1. *Angiogenesis* **15**, 187-197. doi:10.1007/s10456-012-9252-6
- Anton, I. M., Lu, W., Mayer, B. J., Ramesh, N. and Geha, R. S. (1998). The Wiskott-Aldrich syndrome protein-interacting protein (WIP) binds to the adaptor protein Nck. *J. Biol. Chem.* **273**, 20992-20995. doi:10.1074/jbc.273.33.20992
- Artym, V. V., Zhang, Y., Seillier-Moisewitsch, F., Yamada, K. M. and Mueller, S. C. (2006). Dynamic interactions of cortactin and membrane type 1 matrix metalloproteinase at invadopodia: defining the stages of invadopodia formation and function. *Cancer Res.* **66**, 3034-3043. doi:10.1158/0008-5472.CAN-05-2177
- Aryal, A. C., Miyai, K., Hayata, T., Notomi, T., Nakamoto, T., Pawson, T., Ezura, Y. and Noda, M. (2013). Nck1 deficiency accelerates unloading-induced bone loss. *J. Cell. Physiol.* **228**, 1397-1403. doi:10.1002/jcp.24317
- Aryal, A. C. S., Miyai, K., Izu, Y., Hayata, T., Notomi, T., Noda, M. and Ezura, Y. (2015). Nck influences preosteoblastic/osteoblastic migration and bone mass. *Proc. Natl. Acad. Sci. USA* **112**, 15432-15437. doi:10.1073/pnas.1518253112
- Banani, S. F., Lee, H. O., Hyman, A. A. and Rosen, M. K. (2017). Biomolecular condensates: organizers of cellular biochemistry. *Nat. Rev. Mol. Cell Biol.* **18**, 285-298. doi:10.1038/nrm.2017.7
- Banjade, S., Wu, Q., Mittal, A., Peeples, W. B., Pappu, R. V. and Rosen, M. K. (2015). Conserved interdomain linker promotes phase separation of the multivalent adaptor protein Nck. *Proc. Natl. Acad. Sci. USA* **112**, E6426-E6435. doi:10.1073/pnas.1508778112
- Barda-Saad, M., Shirasu, N., Pauker, M. H., Hassan, N., Perl, O., Balbo, A., Yamaguchi, H., Houtman, J. C., Appella, E., Schuck, P. et al. (2010). Cooperative interactions at the SLP-76 complex are critical for actin polymerization. *EMBO J.* **29**, 2315-2328. doi:10.1038/emboj.2010.133
- Benesch, S., Lommel, S., Steffen, A., Stradal, T. E., Scafehorn, N., Way, M., Wehland, J. and Rottner, K. (2002). Phosphatidylinositol 4,5-bisphosphate (PIP2)-induced vesicle movement depends on N-WASP and involves Nck, WIP, and Grb2. *J. Biol. Chem.* **277**, 37771-37776. doi:10.1074/jbc.M204145200
- Bisson, N., Poitras, L., Mikryukov, A., Tremblay, M. and Moss, T. (2007). EphA4 signaling regulates blastomere adhesion in the *Xenopus* embryo by recruiting Pak1 to suppress Cdc42 function. *Mol. Biol. Cell* **18**, 1030-1043. doi:10.1091/mbc.e06-04-0294
- Bladt, F., Aippersbach, E., Gelkop, S., Strasser, G. A., Nash, P., Tafuri, A., Gertler, F. B. and Pawson, T. (2003). The murine Nck SH2/SH3 adaptors are important for the development of mesoderm-derived embryonic structures and for regulating the cellular actin network. *Mol. Cell. Biol.* **23**, 4586-4597. doi:10.1128/MCB.23.13.4586-4597.2003
- Borinskaya, S., Velle, K. B., Campellone, K. G., Talman, A., Alvarez, D., Agaisse, H., Wu, Y. I., Loew, L. M. and Mayer, B. J. (2016). Integration of linear and dendritic actin nucleation in Nck-induced actin comets. *Mol. Biol. Cell* **27**, 247-259. doi:10.1091/mbc.e14-11-1555
- Borroto, A., Arellano, I., Blanco, R., Fuentes, M., Orfao, A., Dopfer, E. P., Prouza, M., Suchanek, M., Schamel, W. W. and Alarcon, B. (2014). Relevance of Nck-CD3 epsilon interaction for T cell activation *in vivo*. *J. Immunol.* **192**, 2042-2053. doi:10.4049/jimmunol.1203414

- Borrito, A., Reyes-Garau, D., Jimenez, M. A., Carrasco, E., Moreno, B., Martinez-Pasamar, S., Cortes, J. R., Perona, A., Abia, D., Blanco, S. et al.** (2016). First-in-class inhibitor of the T cell receptor for the treatment of autoimmune diseases. *Sci. Transl. Med.* **8**, 370ra184. doi:10.1126/scitranslmed.aaf2140
- Buday, L., Wunderlich, L. and Tamas, P.** (2002). The Nck family of adapter proteins: regulators of actin cytoskeleton. *Cell. Signal.* **14**, 723-731. doi:10.1016/S0898-6568(02)00027-X
- Buvall, L., Rashmi, P., Lopez-Rivera, E., Andreeva, S., Weins, A., Wallentin, H., Greka, A. and Mundel, P.** (2013). Proteasomal degradation of Nck1 but not Nck2 regulates RhoA activation and actin dynamics. *Nat. Commun.* **4**, 2863. doi:10.1038/ncomms3863
- Calamito, M., Juntilla, M. M., Thomas, M., Northrup, D. L., Rathmell, J., Birnbaum, M. J., Koretzky, G. and Allman, D.** (2010). Akt1 and Akt2 promote peripheral B-cell maturation and survival. *Blood* **115**, 4043-4050.
- Campellone, K. G., Giese, A., Tipper, D. J. and Leong, J. M.** (2002). A tyrosine-phosphorylated 12-amino-acid sequence of enteropathogenic *Escherichia coli* Tir binds the host adaptor protein Nck and is required for Nck localization to actin pedestals. *Mol. Microbiol.* **43**, 1227-1241. doi:10.1046/j.1365-2958.2002.02817.x
- Campellone, K. G., Rankin, S., Pawson, T., Kirschner, M. W., Tipper, D. J. and Leong, J. M.** (2004). Clustering of Nck by a 12-residue Tir phosphopeptide is sufficient to trigger localized actin assembly. *J. Cell Biol.* **164**, 407-416. doi:10.1083/jcb.200306032
- Cardin, E., Latreille, M., Khoury, C., Greenwood, M. T. and Larose, L.** (2007). Nck-1 selectively modulates eIF2alphaSer51 phosphorylation by a subset of eIF2alpha-kinases. *FEBS J.* **274**, 5865-5875. doi:10.1111/j.1742-4658.2007.06110.x
- Carducci, M., Perfetto, L., Briganti, L., Paoluzi, S., Costa, S., Zerweck, J., Schutkowski, M., Castagnoli, L. and Cesareni, G.** (2012). The protein interaction network mediated by human SH3 domains. *Biotechnol. Adv.* **30**, 4-15. doi:10.1016/j.biotechadv.2011.06.012
- Case, L. B., Ditlev, J. A. and Rosen, M. K.** (2019a). Regulation of Transmembrane Signaling by Phase Separation. *Annu. Rev. Biophys.* **48**, 465-494. doi:10.1146/annurev-biophys-052118-115534
- Case, L. B., Zhang, X., Ditlev, J. A. and Rosen, M. K.** (2019b). Stoichiometry controls activity of phase-separated clusters of actin signaling proteins. *Science* **363**, 1093-1097. doi:10.1126/science.aau6313
- Castello, A., Gaya, M., Tucholski, J., Oellerich, T., Lu, K. H., Tafuri, A., Pawson, T., Wienands, J., Engelke, M. and Batista, F. D.** (2013). Nck-mediated recruitment of BCPAP to the BCR regulates the PI(3)K-Akt pathway in B cells. *Nat. Immunol.* **14**, 966-975. doi:10.1038/ni.2685
- Chaki, S. P., Barhoumi, R., Berginski, M. E., Sreenivasappa, H., Trache, A., Gomez, S. M. and Rivera, G. M.** (2013). Nck enables directional cell migration through the coordination of polarized membrane protrusion with adhesion dynamics. *J. Cell Sci.* **126**, 1637-1649.
- Chaki, S. P., Barhoumi, R. and Rivera, G. M.** (2015). Actin remodeling by Nck regulates endothelial lumen formation. *Mol. Biol. Cell* **26**, 3047-3060. doi:10.1091/mbc.E15-06-0338
- Chen, M., She, H., Davis, E. M., Spicer, C. M., Kim, L., Ren, R., Le Beau, M. M. and Li, W.** (1998). Identification of Nck family genes, chromosomal localization, expression, and signaling specificity. *J. Biol. Chem.* **273**, 25171-25178. doi:10.1074/jbc.273.39.25171
- Chen, M., She, H., Kim, A., Woodley, D. T. and Li, W.** (2000). Nckbeta adapter regulates actin polymerization in NIH 3T3 fibroblasts in response to platelet-derived growth factor bb. *Mol. Cell. Biol.* **20**, 7867-7880. doi:10.1128/MCB.20.21.7867-7880.2000
- Chen, J., Leskov, I. L., Yurdagul, A., Jr, Thiel, B., Kevil, C. G., Stokes, K. Y. and Orr, A. W.** (2015). Recruitment of the adaptor protein Nck to PECAM-1 couples oxidative stress to canonical NF-kappaB signaling and inflammation. *Sci. Signal.* **8**, ra20. doi:10.1126/scisignal.2005648
- Clouthier, D. L., Harris, C. N., Harris, R. A., Martin, C. E., Puri, M. C. and Jones, N.** (2015). Requisite role for Nck adaptors in cardiovascular development and endothelial-to-mesenchymal transition, and directed cell migration. *Mol. Cell. Biol.* **35**, 1573-1587. doi:10.1128/MCB.00072-15
- Cowan, C. A. and Henkemeyer, M.** (2001). The SH2/SH3 adaptor Grb4 transduces B-ephrin reverse signals. *Nature* **413**, 174-179. doi:10.1038/35093123
- Dart, A. E., Donnelly, S. K., Holden, D. W., Way, M. and Caron, E.** (2012). Nck and Cdc42 co-operate to recruit N-WASP to promote FcgammaR-mediated phagocytosis. *J. Cell Sci.* **125**, 2825-2830.
- Diab, A., Qi, J., Shahin, I., Milligan, C. and Fawcett, J. P.** (2020). NCK1 regulates amygdala activity to control context-dependent stress responses and anxiety in male mice. *Neuroscience* **448**, 107-125. doi:10.1016/j.neuroscience.2020.09.026
- Dionne, U., Chartier, F. J. M., Lopez de Los Santos, Y., Lavoie, N., Bernard, D. N., Banerjee, S. L., Otis, F., Jacquet, K., Tremblay, M. G., Jain, M. et al.** (2018). Direct phosphorylation of SRC Homology 3 domains by tyrosine kinase receptors disassembles ligand-induced signaling networks. *Mol. Cell* **70**, 995-1007.e11. doi:10.1016/j.molcel.2018.05.013
- Dionne, U., Bourgault, E., Dube, A. K., Bradley, D., Chartier, F. J. M., Dandage, R., Dibychintan, S., Despres, P. C., Gish, G. D., Pham, N. T. H. et al.** (2021). Protein context shapes the specificity of SH3 domain-mediated interactions in vivo. *Nat. Commun.* **12**, 1597. doi:10.1038/s41467-021-21873-2
- Ditlev, J. A., Michalski, P. J., Huber, G., Rivera, G. M., Mohler, W. A., Loew, L. M. and Mayer, B. J.** (2012). Stoichiometry of Nck-dependent actin polymerization in living cells. *J. Cell Biol.* **197**, 643-658. doi:10.1083/jcb.201111113
- Ditlev, J. A., Vega, A. R., Koster, D. V., Su, X., Tani, T., Lakoduk, A. M., Vale, R. D., Mayor, S., Jaqaman, K. and Rosen, M. K.** (2019). A composition-dependent molecular clutch between T cell signaling condensates and actin. *Elife* **8**, e42695. doi:10.7554/eLife.42695
- Dodding, M. P. and Way, M.** (2009). Nck- and N-WASP-dependent actin-based motility is conserved in divergent vertebrate poxviruses. *Cell Host Microbe* **6**, 536-550. doi:10.1016/j.chom.2009.10.011
- Donnelly, S. K., Weisswange, I., Zettl, M. and Way, M.** (2013). WIP provides an essential link between Nck and N-WASP during Arp2/3-dependent actin polymerization. *Curr. Biol.* **23**, 999-1006. doi:10.1016/j.cub.2013.04.051
- Dottori, M., Hartley, L., Galea, M., Paxinos, G., Polizzotto, M., Kilpatrick, T., Bartlett, P. F., Murphy, M., Köntgen, F. and Boyd, A. W.** (1998). EphA4 (Sek1) receptor tyrosine kinase is required for the development of the corticospinal tract. *Proc. Natl. Acad. Sci. USA* **95**, 13248-13253. doi:10.1073/pnas.95.22.13248
- Dubrac, A., Genet, G., Ola, R., Zhang, F., Pibouin-Fragner, L., Han, J., Zhang, J., Thomas, J. L., Chedotal, A., Schwartz, M. A. et al.** (2016). Targeting NCK-mediated endothelial cell front-rear polarity inhibits neovascularization. *Circulation* **133**, 409-421. doi:10.1161/CIRCULATIONAHA.115.017537
- Dubrac, A., Künzel, S. E., Künzel, S. H., Li, J., Chandran, R. R., Martin, K., Greif, D. M., Adams, R. H. and Eichmann, A.** (2018). NCK-dependent pericyte migration promotes pathological neovascularization in ischemic retinopathy. *Nat. Commun.* **9**, 3463. doi:10.1038/s41467-018-05926-7
- Dusseault, J., Li, B., Haider, N., Goyette, M. A., Cote, J. F. and Larose, L.** (2016). Nck2 Deficiency in mice results in increased adiposity associated with adipocyte hypertrophy and enhanced adipogenesis. *Diabetes* **65**, 2652-2666. doi:10.2337/db15-1559
- Eddy, R. J., Weidmann, M. D., Sharma, V. P. and Condeelis, J. S.** (2017). Tumor Cell Invadopodia: Invasive Protrusions that Orchestrate Metastasis. *Trends Cell Biol.* **27**, 595-607. doi:10.1016/j.tcb.2017.03.003
- Eden, S., Rohatgi, R., Podtelejnikov, A. V., Mann, M. and Kirschner, M. W.** (2002). Mechanism of regulation of WAVE1-induced actin nucleation by Rac1 and Nck. *Nature* **418**, 790-793. doi:10.1038/nature00859
- Errington, T. M. and Macara, I. G.** (2013). Depletion of the adaptor protein NCK increases UV-induced p53 phosphorylation and promotes apoptosis. *PLoS ONE* **8**, e76204. doi:10.1371/journal.pone.0076204
- Fawcett, J. P., Georgiou, J., Ruston, J., Bladt, F., Sherman, A., Warner, N., Saab, B. J., Scott, R., Roder, J. C. and Pawson, T.** (2007). Nck adaptor proteins control the organization of neuronal circuits important for walking. *Proc. Natl. Acad. Sci. USA* **104**, 20973-20978. doi:10.1073/pnas.0710316105
- Feng, S., Chen, J. K., Yu, H., Simon, J. A. and Schreiber, S. L.** (1994). Two binding orientations for peptides to the Src SH3 domain: development of a general model for SH3-ligand interactions. *Science* **266**, 1241-1247. doi:10.1126/science.7526465
- Frese, S., Schubert, W. D., Findeis, A. C., Marquardt, T., Roske, Y. S., Stradal, T. E. and Heinz, D. W.** (2006). The phosphotyrosine peptide binding specificity of Nck1 and Nck2 Src homology 2 domains. *J. Biol. Chem.* **281**, 18236-18245. doi:10.1074/jbc.M512917200
- Frischknecht, F., Moreau, V., Rottger, S., Gonfioni, S., Reckmann, I., Superti-Furga, G. and Way, M.** (1999). Actin-based motility of vaccinia virus mimics receptor tyrosine kinase signalling. *Nature* **401**, 926-929. doi:10.1038/44860
- Garrity, P. A., Rao, Y., Salecker, I., McGlade, J., Pawson, T. and Zipursky, S. L.** (1996). Drosophila photoreceptor axon guidance and targeting requires the dreadlocks SH2/SH3 adapter protein. *Cell* **85**, 639-650. doi:10.1016/S0092-8674(00)81231-3
- Gaud, G., Lesourne, R. and Love, P. E.** (2018). Regulatory mechanisms in T cell receptor signalling. *Nat. Rev. Immunol.* **18**, 485-497. doi:10.1038/s41577-018-0020-8
- Gil, D., Schamel, W. W., Montoya, M., Sanchez-Madrid, F. and Alarcon, B.** (2002). Recruitment of Nck by CD3 epsilon reveals a ligand-induced conformational change essential for T cell receptor signaling and synapse formation. *Cell* **109**, 901-912. doi:10.1016/S0092-8674(02)00799-7
- Gruenheid, S., DeVinney, R., Bladt, F., Goosney, D., Gelkop, S., Gish, G. D., Pawson, T. and Finlay, B. B.** (2001). Enteropathogenic *E. coli* Tir binds Nck to initiate actin pedestal formation in host cells. *Nat. Cell Biol.* **3**, 856-859. doi:10.1038/ncb0901-856
- Guan, S., Chen, M., Woodley, D. and Li, W.** (2007). Nckbeta adapter controls neurogenesis by maintaining the cellular paxillin level. *Mol. Cell. Biol.* **27**, 6001-6011. doi:10.1128/MCB.01807-06
- Guan, S., Fan, J., Han, A., Chen, M., Woodley, D. T. and Li, W.** (2009). Non-compensating roles between Nckalpha and Nckbeta in PDGF-BB signaling to promote human dermal fibroblast migration. *J. Invest. Dermatol.* **129**, 1909-1920. doi:10.1038/jid.2008.457
- Hake, M. J., Choowongkamon, K., Kostenko, O., Carlin, C. R. and Sönnichsen, F. D.** (2008). Specificity determinants of a novel Nck interaction

- with the Juxtamembrane Domain of the epidermal growth factor receptor. *Biochemistry* **47**, 3096-3108. doi:10.1021/bi701549a
- Hammer, J. A., Wang, J. C., Saeed, M. and Pedrosa, A. T.** (2019). Origin, organization, dynamics, and function of actin and actomyosin networks at the T cell immunological synapse. *Annu. Rev. Immunol.* **37**, 201-224. doi:10.1146/annurev-immunol-042718-041341
- Hartl, F. A., Beck-Garcia, E., Woessner, N. M., Flachsman, L. J., Cardenas, R. M. V., Brandl, S. M., Taromi, S., Fiala, G. J., Morath, A., Mishra, P. et al.** (2020). Noncanonical binding of Lck to CD3epsilon promotes TCR signaling and CAR function. *Nat. Immunol.* **21**, 902-913. doi:10.1038/s41590-020-0732-3
- Hartl, F. A., Ngoenkam, J., Beck-Garcia, E., Cerqueira, L., Wipa, P., Paensuwan, P., Suriyaphol, P., Mishra, P., Schraven, B., Gunther, S. et al.** (2021). Cooperative interaction of Nck and Lck orchestrates optimal TCR signaling. *Cells* **10**, 834. doi:10.3390/cells10040834
- Hashimoto-Tane, A. and Saito, T.** (2016). Dynamic Regulation of TCR-Microclusters and the Microsynapse for T Cell Activation. *Front Immunol* **7**, 255. doi:10.3389/fimmu.2016.00255
- Hetz, C., Zhang, K. and Kaufman, R. J.** (2020). Mechanisms, regulation and functions of the unfolded protein response. *Nat. Rev. Mol. Cell Biol.* **21**, 421-438. doi:10.1038/s41580-020-0250-z
- Hotulainen, P. and Lappalainen, P.** (2006). Stress fibers are generated by two distinct actin assembly mechanisms in motile cells. *J. Cell Biol.* **173**, 383-394. doi:10.1083/jcb.200511093
- Humphries, A. C., Donnelly, S. K. and Way, M.** (2014). Cdc42 and the Rho GEF intersectin-1 collaborate with Nck to promote N-WASP-dependent actin polymerisation. *J. Cell Sci.* **127**, 673-685. doi:10.1242/jcs.141366
- Hunter, T.** (2009). Tyrosine phosphorylation: thirty years and counting. *Curr. Opin. Cell Biol.* **21**, 140-146. doi:10.1016/j.cob.2009.01.028
- Hyman, A. A., Weber, C. A. and Julicher, F.** (2014). Liquid-liquid phase separation in biology. *Annu. Rev. Cell Dev. Biol.* **30**, 39-58. doi:10.1146/annurev-cellbio-100913-013325
- Jacquet, K., Banerjee, S. L., Chartier, F. J. M., Elowe, S. and Bisson, N.** (2018). Proteomic analysis of NCK1/2 adaptors uncovers paralog-specific interactions that reveal a new role for NCK2 in cell abscission during cytokinesis. *Mol. Cell. Proteomics* **17**, 1979-1990. doi:10.1074/mcp.RA118.000689
- Jiang, H., Leung, C., Tahan, S. and Wang, D.** (2019). Entry by multiple picornaviruses is dependent on a pathway that includes TNK2, WASL, and NCK1. *Elife* **8**, e50276. doi:10.7554/eLife.50276.sa2
- Jones, N., Blasutig, I. M., Eremina, V., Ruston, J. M., Bladt, F., Li, H., Huang, H., Larose, L., Li, S. S., Takano, T. et al.** (2006). Nck adaptor proteins link nephrin to the actin cytoskeleton of kidney podocytes. *Nature* **440**, 818-823. doi:10.1038/nature04662
- Kebache, S., Zuo, D., Chevet, E. and Larose, L.** (2002). Modulation of protein translation by Nck-1. *Proc. Natl. Acad. Sci. USA* **99**, 5406-5411. doi:10.1073/pnas.082483399
- Kebache, S., Cardin, E., Nguyen, D. T., Chevet, E. and Larose, L.** (2004). Nck-1 antagonizes the endoplasmic reticulum stress-induced inhibition of translation. *J. Biol. Chem.* **279**, 9662-9671. doi:10.1074/jbc.M310535200
- Kefalas, G., Jouvret, N., Baldwin, C., Estall, J. L. and Larose, L.** (2018). Peptide-based sequestration of the adaptor protein Nck1 in pancreatic beta cells enhances insulin biogenesis and protects against diabetic stresses. *J. Biol. Chem.* **293**, 12516-12524. doi:10.1074/jbc.RA118.002728
- Kesti, T., Ruppelt, A., Wang, J. H., Liss, M., Wagner, R., Tasken, K. and Saksela, K.** (2007). Reciprocal regulation of SH3 and SH2 domain binding via tyrosine phosphorylation of a common site in CD3epsilon. *J. Immunol.* **179**, 878-885. doi:10.4049/jimmunol.179.2.878
- Khaitlina, S. Y.** (2014). Intracellular transport based on actin polymerization. *Biochemistry (Mosc.)* **79**, 917-927. doi:10.1134/S0006297914090089
- Kiosses, W. B., Hood, J., Yang, S., Gerritsen, M. E., Chereshe, D. A., Alderson, N. and Schwartz, M. A.** (2002). A dominant-negative p65 PAK peptide inhibits angiogenesis. *Circ. Res.* **90**, 697-702. doi:10.1161/01.RES.0000014227.76102.5D
- Kremer, B. E., Adang, L. A. and Macara, I. G.** (2007). Septins regulate actin organization and cell-cycle arrest through nuclear accumulation of NCK mediated by SOCS7. *Cell* **130**, 837-850. doi:10.1016/j.cell.2007.06.053
- Kumari, S., Curado, S., Mayya, V. and Dustin, M. L.** (2014). T cell antigen receptor activation and actin cytoskeleton remodeling. *Biochim. Biophys. Acta* **1838**, 546-556. doi:10.1016/j.bbamem.2013.05.004
- Lamalice, L., Houle, F. and Huot, J.** (2006). Phosphorylation of Tyr1214 within VEGFR-2 triggers the recruitment of Nck and activation of Fyn leading to SAPK2/p38 activation and endothelial cell migration in response to VEGF. *J. Biol. Chem.* **281**, 34009-34020. doi:10.1074/jbc.M603928200
- Lane, C., Qi, J. and Fawcett, J. P.** (2015). NCK is critical for the development of deleted in colorectal cancer (DCC) sensitive spinal circuits. *J. Neurochem.* **134**, 1008-1014. doi:10.1111/jnc.13137
- Latreille, M. and Larose, L.** (2006). Nck in a complex containing the catalytic subunit of protein phosphatase 1 regulates eukaryotic initiation factor 2alpha signaling and cell survival to endoplasmic reticulum stress. *J. Biol. Chem.* **281**, 26633-26644. doi:10.1074/jbc.M513556200
- Latreille, M., Loberge, M. K., Bourret, G., Yamani, L. and Larose, L.** (2011). Deletion of Nck1 attenuates hepatic ER stress signaling and improves glucose tolerance and insulin signaling in liver of obese mice. *Am. J. Physiol. Endocrinol. Metab.* **300**, E423-E434. doi:10.1152/ajpendo.00088.2010
- Lebensohn, A. M. and Kirschner, M. W.** (2009). Activation of the WAVE complex by coincident signals controls actin assembly. *Mol. Cell* **36**, 512-524. doi:10.1016/j.molcel.2009.10.024
- Lehmann, J. M., Riethmüller, G. and Johnson, J. P.** (1990). Nck, a melanoma cDNA encoding a cytoplasmic protein consisting of the src homology units SH2 and SH3. *Nucleic Acids Res.* **18**, 1048. doi:10.1093/nar/18.4.1048
- Lettau, M., Pieper, J. and Janssen, O.** (2009). Nck adapter proteins: functional versatility in T cells. *Cell Commun. Signal* **7**, 1. doi:10.1186/1478-811X-7-1
- Li, W., Fan, J. H. and Woodley, D. T.** (2001). Nck/Dock: an adapter between cell surface receptors and the actin cytoskeleton. *Oncogene* **20**, 6403-6417. doi:10.1038/sj.onc.1204782
- Li, X., Meriane, M., Triki, I., Shekarabi, M., Kennedy, T. E., Larose, L. and Lamarche-Vane, N.** (2002). The adaptor protein Nck-1 couples the netrin-1 receptor DCC (deleted in colorectal cancer) to the activation of the small GTPase Rac1 through an atypical mechanism. *J. Biol. Chem.* **277**, 37788-37797. doi:10.1074/jbc.M205428200
- Li, P., Banjade, S., Cheng, H. C., Kim, S., Chen, B., Guo, L., Llaguno, M., Hollingsworth, J. V., King, D. S., Banani, S. F. et al.** (2012). Phase transitions in the assembly of multivalent signalling proteins. *Nature* **483**, 336-340. doi:10.1038/nature10879
- Lim, W. A., Richards, F. M. and Fox, R. O.** (1994). Structural determinants of peptide-binding orientation and of sequence specificity in SH3 domains. *Nature* **372**, 375-379. doi:10.1038/372375a0
- Liu, B. A., Jablonowski, K., Raina, M., Arce, M., Pawson, T. and Nash, P. D.** (2006a). The human and mouse complement of SH2 domain proteins-establishing the boundaries of phosphotyrosine signaling. *Mol. Cell* **22**, 851-868. doi:10.1016/j.molcel.2006.06.001
- Liu, J., Li, M., Ran, X., Fan, J. S. and Song, J.** (2006b). Structural insight into the binding diversity between the human Nck2 SH3 domains and proline-rich proteins. *Biochemistry* **45**, 7171-7184. doi:10.1021/bi060091y
- Livne, A. and Geiger, B.** (2016). The inner workings of stress fibers - from contractile machinery to focal adhesions and back. *J. Cell Sci.* **129**, 1293-1304. doi:10.1242/jcs.180927
- Love, P. E. and Hayes, S. M.** (2010). ITAM-mediated signaling by the T-cell antigen receptor. *Cold Spring Harb. Perspect Biol.* **2**, a002485. doi:10.1101/cshperspect.a002485
- Lyon, A. S., Peeples, W. B. and Rosen, M. K.** (2020). A framework for understanding the functions of biomolecular condensates across scales. *Nat. Rev. Mol. Cell Biol.* **22**, 215-235.
- Machida, K. and Mayer, B. J.** (2005). The SH2 domain: versatile signaling module and pharmaceutical target. *Biochim. Biophys. Acta* **1747**, 1-25. doi:10.1016/j.bbapap.2004.10.005
- Marasco, M. and Carlomagno, T.** (2020). Specificity and regulation of phosphotyrosine signaling through SH2 domains. *J. Struct. Biol. X* **4**, 100026. doi:10.1016/j.yjsbx.2020.100026
- Martin, C. E., New, L. A., Phippen, N. J., Keyvani Chahi, A., Mitro, A. E., Takano, T., Pawson, T., Blasutig, I. M. and Jones, N.** (2020). Multivalent nephrin-Nck interactions define a threshold for clustering and tyrosine-dependent nephrin endocytosis. *J. Cell Sci.* **133**, jcs236877. doi:10.1242/jcs.236877
- Martinez-Quiles, N., Rohatgi, R., Anton, I. M., Medina, M., Saville, S. P., Miki, H., Yamaguchi, H., Takenawa, T., Hartwig, J. H., Geha, R. S. et al.** (2001). WIP regulates N-WASP-mediated actin polymerization and filopodium formation. *Nat. Cell Biol.* **3**, 484-491. doi:10.1038/35074551
- Mattila, P. K. and Lappalainen, P.** (2008). Filopodia: molecular architecture and cellular functions. *Nat. Rev. Mol. Cell Biol.* **9**, 446-454. doi:10.1038/nrm2406
- Mayer, B. J.** (2001). SH3 domains: complexity in moderation. *J. Cell Sci.* **114**, 1253-1263. doi:10.1242/jcs.114.7.1253
- Moreau, V., Frischknecht, F., Reckmann, I., Vincentelli, R., Rabut, G., Stewart, D. and Way, M.** (2000). A complex of N-WASP and WIP integrates signalling cascades that lead to actin polymerization. *Nat. Cell Biol.* **2**, 441-448. doi:10.1038/35017080
- Morris, D. C., Popp, J. L., Tang, L. K., Gibbs, H. C., Schmitt, E., Chaki, S. P., Bywaters, B. C., Yeh, A. T., Porter, W. W., Burghardt, R. C. et al.** (2017). Nck deficiency is associated with delayed breast carcinoma progression and reduced metastasis. *Mol. Biol. Cell* **28**, 3500-3516. doi:10.1091/mbc.e17-02-0106
- Mukherjee, C., Bakthavachalu, B. and Schoenberg, D. R.** (2014). The cytoplasmic capping complex assembles on adapter protein nck1 bound to the proline-rich C-terminus of Mammalian capping enzyme. *PLoS Biol.* **12**, e1001933. doi:10.1371/journal.pbio.1001933
- Nelson, W. J.** (2009). Remodeling epithelial cell organization: transitions between front-rear and apical-basal polarity. *Cold Spring Harb. Perspect Biol.* **1**, a000513. doi:10.1101/cshperspect.a000513
- New, L. A., Keyvani Chahi, A. and Jones, N.** (2013). Direct regulation of nephrin tyrosine phosphorylation by Nck adaptor proteins. *J. Biol. Chem.* **288**, 1500-1510. doi:10.1074/jbc.M112.439463



- Nguyen, D. T., Kebache, S., Fazel, A., Wong, H. N., Jenna, S., Emadali, A., Lee, E. H., Bergeron, J. J., Kaufman, R. J., Larose, L. et al. (2004). Nck-dependent activation of extracellular signal-regulated kinase-1 and regulation of cell survival during endoplasmic reticulum stress. *Mol. Biol. Cell* **15**, 4248-4260. doi:10.1091/mbc.e03-11-0851
- Nieto-Pelegrin, E., Meiler, E., Martin-Villa, J. M., Benito-Leon, M. and Martinez-Quiles, N. (2014). Crk adaptors negatively regulate actin polymerization in pedestals formed by enteropathogenic *Escherichia coli* (EPEC) by binding to Tir effector. *PLoS Pathog.* **10**, e1004022. doi:10.1371/journal.ppat.1004022
- Nishimura, R., Li, W., Kashishian, A., Mondino, A., Zhou, M., Cooper, J. and Schlessinger, J. (1993). Two signaling molecules share a phosphotyrosine-containing binding site in the platelet-derived growth factor receptor. *Mol. Cell. Biol.* **13**, 6889-6896.
- Okrut, J., Prakash, S., Wu, Q., Kelly, M. J. and Taunton, J. (2015). Allosteric N-WASP activation by an inter-SH3 domain linker in Nck. *Proc. Natl. Acad. Sci. USA* **112**, E6436-E6445. doi:10.1073/pnas.1510876112
- Orr, A. W., Stockton, R., Simmers, M. B., Sanders, J. M., Sarembock, I. J., Blackman, B. R. and Schwartz, M. A. (2007). Matrix-specific p21-activated kinase activation regulates vascular permeability in atherosclerosis. *J. Cell Biol.* **176**, 719-727. doi:10.1083/jcb.200609008
- Oser, M., Yamaguchi, H., Mader, C. C., Bravo-Cordero, J. J., Arias, M., Chen, X., Desmarais, V., van Rheenen, J., Koleske, A. J. and Condeelis, J. (2009). Cortactin regulates cofilin and N-WASP activities to control the stages of invadopodium assembly and maturation. *J. Cell Biol.* **186**, 571-587. doi:10.1083/jcb.200812176
- Oser, M., Mader, C. C., Gil-Henn, H., Magalhaes, M., Bravo-Cordero, J. J., Koleske, A. J. and Condeelis, J. (2010). Specific tyrosine phosphorylation sites on cortactin regulate Nck1-dependent actin polymerization in invadopodia. *J. Cell Sci.* **123**, 3662-3673. doi:10.1242/jcs.068163
- Padrick, S. B., Cheng, H. C., Ismail, A. M., Panchal, S. C., Doolittle, L. K., Kim, S., Skehan, B. M., Umetani, J., Brautigam, C. A., Leong, J. M. et al. (2008). Hierarchical regulation of WASP/WAVE proteins. *Mol. Cell* **32**, 426-438. doi:10.1016/j.molcel.2008.10.012
- Paensuan, P., Hartl, F. A., Yousefi, O. S., Ngoenkam, J., Wipa, P., Beck-Garcia, E., Dopfer, E. P., Khamisri, B., Sanguanserm, D., Minguet, S. et al. (2016). Nck Binds to the T Cell Antigen Receptor Using Its SH3.1 and SH2 Domains in a Cooperative Manner, Promoting TCR Functioning. *J. Immunol.* **196**, 448-458. doi:10.4049/jimmunol.1500958
- Pfanzelt, J., Mostowy, S. and Way, M. (2018). Septins suppress the release of vaccinia virus from infected cells. *J. Cell Biol.* **217**, 2911-2929. doi:10.1083/jcb.201708091
- Pils, S., Kopp, K., Peterson, L., Delgado Tascon, J., Nyffenegger-Jann, N. J. and Hauck, C. R. (2012). The adaptor molecule Nck localizes the WAVE complex to promote actin polymerization during CEACAM3-mediated phagocytosis of bacteria. *PLoS ONE* **7**, e32808. doi:10.1371/journal.pone.0032808
- Pramatarova, A., Ochalski, P. G., Chen, K., Gropman, A., Myers, S., Min, K. T. and Howell, B. W. (2003). Nck beta interacts with tyrosine-phosphorylated disabled 1 and redistributes in Reelin-stimulated neurons. *Mol. Cell. Biol.* **23**, 7210-7221. doi:10.1128/MCB.23.20.7210-7221.2003
- Qiu, J., Nie, Y., Zhao, Y., Zhang, Y., Li, L., Wang, R., Wang, M., Chen, S., Wang, J., Li, Y. Q. et al. (2020). Safeguarding intestine cells against enteropathogenic *Escherichia coli* by intracellular protein reaction, a preventive antibacterial mechanism. *Proc. Natl. Acad. Sci. USA* **117**, 5260-5268. doi:10.1073/pnas.1914567117
- Richter, K., Rufer, A. C., Muller, M., Burger, D., Casagrande, F., Grossenbacher, T., Huber, S., Hug, M. N., Koldewey, P., D'Ossualdo, A. et al. (2020). Small molecule AX-024 reduces T cell proliferation independently of CD3/Nck1 interaction, which is governed by a domain swap in the Nck1-SH3.1 domain. *J. Biol. Chem.* **295**, 7849-7864. doi:10.1074/jbc.RA120.012788
- Rivera, G. M., Briceno, C. A., Takeshima, F., Snapper, S. B. and Mayer, B. J. (2004). Inducible clustering of membrane-targeted SH3 domains of the adaptor protein Nck triggers localized actin polymerization. *Curr. Biol.* **14**, 11-22. doi:10.1016/j.cub.2003.12.033
- Rivera, G. M., Antoku, S., Gelkop, S., Shin, N. Y., Hanks, S. K., Pawson, T. and Mayer, B. J. (2006). Requirement of Nck adaptors for actin dynamics and cell migration stimulated by platelet-derived growth factor B. *Proc. Natl. Acad. Sci. USA* **103**, 9536-9541. doi:10.1073/pnas.0603786103
- Rivera, G. M., Vasilescu, D., Papayannopoulos, V., Lim, W. A. and Mayer, B. J. (2009). A reciprocal interdependence between Nck and PI(4,5)P(2) promotes localized N-WASP-mediated actin polymerization in living cells. *Mol. Cell* **36**, 525-535. doi:10.1016/j.molcel.2009.10.025
- Rohatgi, R., Ho, H. Y. and Kirschner, M. W. (2000). Mechanism of N-WASP activation by CDC42 and phosphatidylinositol 4, 5-bisphosphate. *J. Cell Biol.* **150**, 1299-1310. doi:10.1083/jcb.150.6.1299
- Rohatgi, R., Nollau, P., Ho, H. Y., Kirschner, M. W. and Mayer, B. J. (2001). Nck and phosphatidylinositol 4,5-bisphosphate synergistically activate actin polymerization through the N-WASP-Arp2/3 pathway. *J. Biol. Chem.* **276**, 26448-26452. doi:10.1074/jbc.M103856200
- Ron, D. and Walter, P. (2007). Signal integration in the endoplasmic reticulum unfolded protein response. *Nat. Rev. Mol. Cell Biol.* **8**, 519-529. doi:10.1038/nrm2199
- Roy, E., Togbe, D., Holdorf, A. D., Trubetskoy, D., Nabti, S., Kubbeck, G., Klevenz, A., Kopp-Schneider, A., Leithauer, F., Moller, P. et al. (2010). Nck adaptors are positive regulators of the size and sensitivity of the T-cell repertoire. *Proc. Natl. Acad. Sci. USA* **107**, 15529-15534. doi:10.1073/pnas.1009743107
- Ruusala, A., Pawson, T., Heldin, C. H. and Aspenstrom, P. (2008). Nck adaptors are involved in the formation of dorsal ruffles, cell migration, and Rho signaling downstream of the platelet-derived growth factor beta receptor. *J. Biol. Chem.* **283**, 30034-30044. doi:10.1074/jbc.M800913200
- Saksela, K. and Permi, P. (2012). SH3 domain ligand binding: What's the consensus and where's the specificity? *FEBS Lett.* **586**, 2609-2614. doi:10.1016/j.febslet.2012.04.042
- Schlessinger, J. and Lemmon, M. A. (2003). SH2 and PTB domains in tyrosine kinase signaling. *Sci. STKE* **2003**, RE12.
- Schoenberg, D. R. and Maquat, L. E. (2009). Re-capping the message. *Trends Biochem. Sci.* **34**, 435-442. doi:10.1016/j.tibs.2009.05.003
- Songyang, Z., Shoelson, S. E., Chaudhuri, M., Gish, G., Pawson, T., Haser, W. G., King, F., Roberts, T., Ratnofsky, S., Lechleider, R. J. et al. (1993). SH2 domains recognize specific phosphopeptide sequences. *Cell* **72**, 767-778. doi:10.1016/0092-8674(93)90404-E
- Spiliotis, E. T. and McMurray, M. A. (2020). Masters of asymmetry - lessons and perspectives from 50 years of septins. *Mol. Biol. Cell* **31**, 2289-2297. doi:10.1091/mbc.E19-11-0648
- Stoletov, K. V., Ratcliffe, K. E., Spring, S. C. and Terman, B. I. (2001). NCK and PAK participate in the signaling pathway by which vascular endothelial growth factor stimulates the assembly of focal adhesions. *J. Biol. Chem.* **276**, 22748-22755. doi:10.1074/jbc.M009720200
- Stylli, S. S., Stacey, T. T., Verhagen, A. M., Xu, S. S., Pass, I., Courtneidge, S. A. and Lock, P. (2009). Nck adaptor proteins link Tks5 to invadopodia actin regulation and ECM degradation. *J. Cell Sci.* **122**, 2727-2740. doi:10.1242/jcs.046680
- Su, X., Ditlev, J. A., Hui, E., Xing, W., Banjade, S., Okrut, J., King, D. S., Taunton, J., Rosen, M. K. and Vale, R. D. (2016). Phase separation of signaling molecules promotes T cell receptor signal transduction. *Science* **352**, 595-599. doi:10.1126/science.aad9964
- Takeuchi, K., Yang, H., Ng, E., Park, S. Y., Sun, Z. Y., Reinherz, E. L. and Wagner, G. (2008). Structural and functional evidence that Nck interaction with CD3epsilon regulates T-cell receptor activity. *J. Mol. Biol.* **380**, 704-716. doi:10.1016/j.jmb.2008.05.037
- Takeuchi, K., Sun, Z. Y., Park, S. and Wagner, G. (2010). Autoinhibitory interaction in the multidomain adaptor protein Nck: possible roles in improving specificity and functional diversity. *Biochemistry* **49**, 5634-5641. doi:10.1021/bi100322m
- Tanaka, M., Lu, W., Gupta, R. and Mayer, B. J. (1997). Expression of mutated Nck SH2/SH3 adaptor rescues mesodermal cell fate in *Xenopus laevis* development. *Proc. Natl. Acad. Sci. USA* **94**, 4493-4498. doi:10.1073/pnas.94.9.4493
- Tanaka, S. and Baba, Y. (2020). B Cell Receptor Signaling. In *B Cells in Immunity and Tolerance* (ed. J.-Y. Wang), pp. 23-36. Singapore: Springer Singapore.
- Teyra, J., Huang, H., Jain, S., Guan, X., Dong, A., Liu, Y., Tempel, W., Min, J., Tong, Y., Kim, P. M. et al. (2017). Comprehensive Analysis of the Human SH3 Domain Family Reveals a Wide Variety of Non-canonical Specificities. *Structure* **25**, 1598-1610.e3. doi:10.1016/j.str.2017.07.017
- Thevenot, E., Moreau, A. W., Rousseau, V., Combeau, G., Domenichini, F., Jacquet, C., Goupille, O., Amar, M., Kreis, P., Fossier, P. et al. (2011). p21-Activated kinase 3 (PAK3) protein regulates synaptic transmission through its interaction with the Nck2/Grb4 protein adaptor. *J. Biol. Chem.* **286**, 40044-40059. doi:10.1074/jbc.M111.262246
- Tie, S. R., McCarthy, D. J., Kendrick, T. S., Louw, A., Le, C., Satiaputra, J., Kucera, N., Phillips, M. and Ingley, E. (2016). Regulation of sarcoma cell migration, invasion and invadopodia formation by AFAP1L1 through a phosphotyrosine-dependent pathway. *Oncogene* **35**, 2098-2111. doi:10.1038/onc.2015.272
- Tinti, M., Kierner, L., Costa, S., Miller, M. L., Sacco, F., Olsen, J. V., Carducci, M., Paoluzi, S., Langone, F., Workman, C. T. et al. (2013). The SH2 domain interaction landscape. *Cell Rep* **3**, 1293-1305. doi:10.1016/j.celrep.2013.03.001
- Uchida, K., Suzuki, K., Iwamoto, M., Kawachi, H., Ohno, M., Horita, S. and Nitta, K. (2008). Decreased tyrosine phosphorylation of nephrin in rat and human nephrosis. *Kidney Int.* **73**, 926-932. doi:10.1038/ki.2008.19
- Vallance, B. A. and Finlay, B. B. (2000). Exploitation of host cells by enteropathogenic *Escherichia coli*. *Proc. Natl. Acad. Sci. USA* **97**, 8799-8806. doi:10.1073/pnas.97.16.8799
- Verma, R., Kovari, I., Soofi, A., Nihalani, D., Patrie, K. and Holzman, L. B. (2006). Nephrin ectodomain engagement results in Src kinase activation, nephrin phosphorylation, Nck recruitment, and actin polymerization. *J. Clin. Invest.* **116**, 16.
- Wagner, M. J., Stacey, M. M., Liu, B. A. and Pawson, T. (2013). Molecular mechanisms of SH2- and PTB-domain-containing proteins in receptor tyrosine kinase signaling. *Cold Spring Harb Perspect Biol* **5**, a008987. doi:10.1101/cshperspect.a008987

- Wegmann, S., Eftekharzadeh, B., Tepper, K., Zoltowska, K. M., Bennett, R. E., Dujardin, S., Laskowski, P. R., MacKenzie, D., Kamath, T., Commins, C. et al. (2018). Tau protein liquid-liquid phase separation can initiate tau aggregation. *EMBO J.* **37**, e98049. doi:10.15252/embj.201798049
- Wegmeyer, H., Egea, J., Rabe, N., Gezelius, H., Filosa, A., Enjin, A., Varoqueaux, F., Deininger, K., Schnutgen, F., Brose, N. et al. (2007). EphA4-dependent axon guidance is mediated by the RacGAP alpha2-chimaerin. *Neuron* **55**, 756-767. doi:10.1016/j.neuron.2007.07.038
- Weisswange, I., Newsome, T. P., Schleich, S. and Way, M. (2009). The rate of N-WASP exchange limits the extent of ARP2/3-complex-dependent actin-based motility. *Nature* **458**, 87-91. doi:10.1038/nature07773
- Welch, M. D. and Way, M. (2013). Arp2/3-mediated actin-based motility: a tail of pathogen abuse. *Cell Host Microbe* **14**, 242-255. doi:10.1016/j.chom.2013.08.011
- Woodring, P. J., Meisenhelder, J., Johnson, S. A., Zhou, G. L., Field, J., Shah, K., Bladt, F., Pawson, T., Niki, M., Pandolfi, P. P. et al. (2004). c-Abl phosphorylates Dok1 to promote filopodia during cell spreading. *J. Cell Biol.* **165**, 493-503. doi:10.1083/jcb.200312171
- Wunderlich, L., Goher, A., Farago, A., Downward, J. and Buday, L. (1999). Requirement of multiple SH3 domains of Nck for ligand binding. *Cell. Signal.* **11**, 253-262. doi:10.1016/S0898-6568(98)00054-0
- Yamaguchi, H., Lorenz, M., Kempiak, S., Sarmiento, C., Coniglio, S., Symons, M., Segall, J., Eddy, R., Miki, H., Takenawa, T. et al. (2005). Molecular mechanisms of invadopodium formation: the role of the N-WASP-Arp2/3 complex pathway and cofilin. *J. Cell Biol.* **168**, 441-452. doi:10.1083/jcb.200407076
- Yamani, L., Latreille, M. and Larose, L. (2014). Interaction of Nck1 and PERK phosphorylated at Y(5)(6)(1) negatively modulates PERK activity and PERK regulation of pancreatic beta-cell proinsulin content. *Mol. Biol. Cell* **25**, 702-711. doi:10.1091/mbc.e13-09-0511
- Yamani, L., Li, B. and Larose, L. (2015). Nck1 deficiency improves pancreatic beta cell survival to diabetes-relevant stresses by modulating PERK activation and signaling. *Cell. Signal.* **27**, 2555-2567. doi:10.1016/j.cellsig.2015.09.016
- Yu, X., Zech, T., McDonald, L., Gonzalez, E. G., Li, A., Macpherson, I., Schwarz, J. P., Spence, H., Futo, K., Timpson, P. et al. (2012). N-WASP coordinates the delivery and F-actin-mediated capture of MT1-MMP at invasive pseudopods. *J. Cell Biol.* **199**, 527-544. doi:10.1083/jcb.201203025
- Zeng, R., Cannon, J. L., Abraham, R. T., Way, M., Billadeau, D. D., Bubeck-Wardenberg, J. and Burkhardt, J. K. (2003). SLP-76 coordinates Nck-dependent Wiskott-Aldrich syndrome protein recruitment with Vav-1/Cdc42-dependent Wiskott-Aldrich syndrome protein activation at the T cell-APC contact site. *J. Immunol.* **171**, 1360-1368. doi:10.4049/jimmunol.171.3.1360
- Zhao, Z. S., Manser, E. and Lim, L. (2000). Interaction between PAK and nck: a template for Nck targets and role of PAK autophosphorylation. *Mol. Cell. Biol.* **20**, 3906-3917. doi:10.1128/MCB.20.11.3906-3917.2000
- Zhou, G. L., Zhuo, Y., King, C. C., Fryer, B. H., Bokoch, G. M. and Field, J. (2003). Akt phosphorylation of serine 21 on Pak1 modulates Nck binding and cell migration. *Mol. Cell. Biol.* **23**, 8058-8069. doi:10.1128/MCB.23.22.8058-8069.2003.
